# Supplementary material for: Anatomical Dimensions of the Lumbar Dural Sac Predict the Sensory Block Level of Continuous Epidural Analgesia during Labor
Source: Research Square preprint supplement (doi:10.21203/rs.3.rs-345976/v1), 2021-04-05
Supplement: Supplementary file 3 [file 128edfd8f38f7f2dedf962d9.xlsx]

## Sheet: Sheet1
	Hospital number	Age	Height, cm	Weight, kg	BMI	L1-L2 DSD	L2-L3 DSD	L3-L4 DSD	L4-L5 DSD	L5-S1 DSD	Average value of DSD, cm	DSL, cm	DSV, cm3	DSA, cm2	Temperature block level at 30 min	pain block level at 30min	Tactile block level at 30 min	Peak level of temperature block	Peak level of pain block	Peak level of tactile block	Time required for VAS score to decline to 3,min
1	A391390	27	158	61.5	24.64	1.6	1.43	1.38	1.08	1.18	1.334	10	13.88	41.5	T6	T7	T10	T6	T7	T10	30
2	A382506	24	160	62	24.22	1.34	1.18	1.06	1.02	1.52	1.224	11	11.93	40.44	T7.5	T8	T11	T7	T7	T11	30
3	A382005	29	158	72	28.84	1.31	1.35	1.38	1.33	1.49	1.372	10.5	15.35	45	T6	T7	T10	T6	T7	T10	15
4	A383706	27	160	66	25.78	1.32	1.4	1.25	1.06	1.1	1.226	11	13.76	43.82	T7	T7	T11	T7	T7	T11	30
5	A383574	30	168	70	24.8	1.68	1.93	1.57	1.2	1.12	1.5	13.8	26.96	67.42	T9	T9	T11	T8	T8.5	T11	50
6	A383708	25	164	60	22.31	1.38	1.32	1.3	1.3	1.3	1.32	11.3	15.4	46.7	T7	T8	T11	T7	T7	T11	40
7	A384425	28	158	70	28.04	1.42	1.59	1.46	1.3	1.3	1.414	10	16.1	44.86	T6	T6	T10	T6	T6	T10	15
8	A384269	28	161	64	25.46	1.2	1.34	1.38	1.2	1.2	1.264	11	14.35	44.5	T7	T7	T11	T7	T7	T11	25
9	A384424	31	164	62	23.05	2.61	1.64	1.63	1.32	1.2	1.68	11.2	23.26	56.41	T7	T8	T11	T7	T7	T11	30
13	A383263	24	158	55.5	22.23	1.2	1.3	1.2	1.2	1	1.18	12.2	14.07	46.4	T8	T8	T12	T8	T8	T11	45
15	A387679	26	153	66	28.19	1.77	1.5	1.64	1.38	1.68	1.594	10.1	19.8	50.77	T6.5	T7	T10	T6.5	T7	T10	20
17	A387185	28	160	65	25.39	0.78	1.14	1.3	1.08	1.45	1.15	10.96	11.87	40.18	T7	T7.5	T10.5	T7	T7.5	T10.5	25
19	A387940	26	163	71	26.72	1.32	1.4	1.25	1.06	1.15	1.236	11	13.68	43.33	T7	T7	T11	T7	T7	T10.5	25
20	A390012	28	152	57	23.73	0.99	1.02	1.4	1.19	1.2	1.16	10.5	11.49	38.76	T6.5	T7	T11	T6.5	T7	T11	30
21	A390872	29	162	69	26.29	1.76	1.4	1.4	1.31	1.4	1.454	11	17.74	49.4	T7	T7	T11	T7	T7	T11	30
24	A600026	27	167	57	20.44	1.66	1.4	1.62	1.56	1.25	1.498	13	23.44	61.81	T8	T8	T11	T8	T8.5	T11	40
25	A391311	31	165	78	28.65	1.29	1.4	1.27	1.45	1.42	1.366	12	17.49	51.34	T6.5	T7	T12	T6.5	T7	T11	30
26	A390012	28	160	74	28.9	1.53	1.34	1.58	1.2	1.21	1.372	11	16.92	48.24	T6	T7	T10.5	T6	T7	T10.5	20
27	A391199	27	163	70	26.35	1.01	1.35	1.34	1.51	1.44	1.33	12	17.29	50.89	T7	T8	T11	T7	T8	T11	30
29	A391811	28	159	66	26.11	1.28	1.36	1.29	1.58	1.49	1.4	11.99	18.51	52.71	T7	T8	T11	T7	T8	T11	30
30	A600860	24	162	76	28.96	1.38	1.36	1.19	1.34	1.19	1.292	13.15	17.36	53.52	T8	T8	T11	T8	T8	T11	30
31	A601223	27	163	74	27.85	1.42	1.4	1.44	1.34	1.16	1.352	12	19.13	53.65	T7	T8	T11	T7	T8	T11	30
32	A600860	27	164	70	26.03	1.55	1.4	1.34	1.44	1.01	1.348	13.67	20.11	58.61	T8	T9	T11	T8	T9	T11	35
33	A601565	29	157	58	28.53	1.51	1.47	1.12	1.47	1.19	1.352	11.33	16.45	48.28	T6	T7	T10.5	T6	T7	T10.5	20
34	A601555	24	160	76	29.69	1.77	1.45	1.64	1.38	1.68	1.584	10.37	19.51	50.41	T6	T7	T10.5	T6	T7	T10	20
35	A601512	28	165	80	29.38	1.9	1.47	2.07	1.84	1.73	1.802	13.22	34.34	75.41	T7.5	T8	T11	T7.5	T8	T11	35
36	A601923	27	160	67	26.17	1.69	1.66	1.3	1.81	1.38	1.568	10.21	20.13	50.8	T6	T7	T10.5	T6	T7	T10.5	20
37	A601718	25	170	84	29.07	1.45	1.19	1.34	1.42	1.14	1.308	14.75	20	60.81	T7.5	T9	T11	T7.5	T8.5	T11	35
38	A603498	31	158	59	23.63	1.38	1.6	1.46	1.4	1.4	1.448	13.3	22.54	61.33	T8.5	T8.5	T11	T8.5	T8.5	T11	35
39	A603823	28	163	70	26.35	1.42	1.4	1.44	1.34	1.16	1.352	12.35	18.05	52.85	T7	T8	T11	T7	T8	T11	30
41	A603830	29	157	64	25.96	1.38	1.55	1.84	1.85	1.34	1.592	11.43	24.4	58.99	T7	T8	T11	T7	T8	T11	30
42	A603640	28	165	65	23.88	1.44	1.1	1.32	1.69	1.05	1.32	13.13	18.67	55.2	T8	T8.5	T11	T8	T8.5	T11	30
43	A603468	23	171	85	29.07	1.23	1.53	1.3	1.02	1.1	1.236	14.3	18.1	56.59	T8	T8.5	T11	T8	T8.5	T11	35
45	A606354	29	165	65	23.88	1.66	1.58	1.6	1.55	0.99	1.476	16.53	29.96	78.55	T9	T10	T12	T9	T10	T12	50
46	A606816	28	163	63	23.71	1.6	1.5	1.6	1.55	1	1.45	14.5	25.81	68.34	T9	T9	T11	T8.5	T8.5	T11	45
47	A607174	24	166	63	22.86	1.86	1.8	2	2	1.88	1.908	15	43.22	90.21	T8.5	T9	T12	T8.5	T9	T12	45
48	A608956	24	165	67	22.41	1.86	1.62	1.55	2.7	1.88	1.922	14.27	43.32	87.24	T9	T10	T12	T9	T10	T12	45
53	A614521	28	160	63	24.61	1.4	1.4	1.42	1.1	1.1	1.284	13	17.67	53.49	T8	T8	T11	T8	T8	T11	30
54	A615813	27	165	64	23.51	1.4	1.44	1.45	1.3	1.2	1.358	14	20.96	60.63	T8.5	T8.5	T12	T8.5	T8.5	T11	45
56	A618484	28	170	77.5	26.82	1.76	1.7	2.13	1.5	1.76	1.77	13.23	33.29	74.24	T8	T9	T11	T8	T9	T11	45
57	A622491	25	160	90	35.16	1.19	1.04	1.16	1.4	1.09	1.176	12.62	14.2	47.3	T6	T6	T10	T6	T6	T10	25
59	A622607	32	163	64.5	24.28	1.55	1.38	1.56	1.34	1.55	1.476	11.85	19.82	54.31	T7	T8	T11	T7	T8	T10.5	25
62	A648936	33	164	76	28.26	1.68	1.7	1.7	1.1	1.4	1.516	13.5	24.91	64.44	T7.5	T8.5	T11	T7.5	T8.5	T11	30
63	A648950	28	168	78	27.64	1.3	1.4	1.42	1.42	1.3	1.368	11.5	17.3	49.99	T7	T7	T10.5	T7	T7	T10.5	15
65	A649533	24	165	64	23.51	1.1	1.45	1.44	1.3	0.91	1.24	13.88	18.89	57.08	T8	T9	T12	T8	T9	T11	35
66	A649550	28	168	75.5	27.24	1.68	1.83	1.72	1.06	1.6	1.578	14.05	32.27	75.42	T8	T8.5	T12	T8	T8.5	T11.5	30
67	A641681	28	160	67	26.17	1.97	1.77	1.64	1.17	1.35	1.58	12.44	25.22	62.1	T7.5	T8.5	T11	T7.5	T8.5	T11	25
68	A649828	25	162	59	22.48	1.4	1.3	1.32	1.4	1.2	1.324	12	17.03	48.47	T7	T8.5	T11	T7	T8.5	T11	30
69	A649746	30	153	63	26.91	1.01	1.04	1.3	1.4	1	1.15	11.5	12.88	42.9	T6.5	T6.5	T11	T6.5	T6.5	T11	10
71	A649726	27	158	71	28.44	1.35	1.32	1.35	1.36	1.45	1.366	10.6	15.3	45.14	T6	T7	T10	T6	T7	T10	10
74	A650079	25	160	69	26.95	1.15	1.58	1.23	1.19	1.3	1.29	13.74	18.39	56.2	T8	T8	T11	T8	T8	T11	30
75	A650787	26	158	82	32.85	1.2	1.4	1.3	1.2	1.12	1.244	10.5	12.6	40.75	T6	T6	T10	T6	T6	T10	10
76	A651457	27	163	63	23.71	1.53	1.6	1.38	1.55	1.4	1.492	11.5	15.93	47.96	T7	T7.5	T11	T7	T7.5	T11	25
77	A649292	28	166	63	22.86	1.6	1.56	1.6	1.2	1.35	1.462	12.5	21.23	57.51	T7.5	T8	T12	T7.5	T8	T11	35
79	A651717	29	170	87	28.03	1.3	1.5	1.5	1.3	1.2	1.36	13	19.3	56.06	T7.5	T7.5	T11	T7.5	T7.5	T11	30
80	A650389	29	162	85	32.39	1.4	1.38	1.34	1.1	1.2	1.284	11.4	14.81	45.92	T6	T6.5	T11	T6	T6.5	T11	10
82	A652184	27	162	67.5	25.72	1.45	1.42	1.24	1.3	1.2	1.322	11.5	15.86	47.81	T7	T7.5	T11	T7	T7.5	T11	25
84	A651066	28	163	65	24.46	1.2	1.4	1.3	1.3	1.3	1.3	12.5	16.94	51.56	T7.5	T8	T11	T7.5	T8	T11	30
85	A651866	30	147	72	33.32	1.4	1.45	1.3	1.1	1.18	1.286	10	12.85	39.97	T6	T6	T10	T6	T6	T10	10
86	A653359	31	156	58	23.83	1.5	1.32	1.6	1.2	1.2	1.364	11	16.64	47.83	T7	T7	T11	T7	T7	T11	25
87	A651830	29	161	71.5	27.58	1.6	1.52	1.2	1.45	1.1	1.374	11	16.83	48.08	T6.5	T6.5	T11	T6.5	T6.5	T11	15
88	A653514	32	163	68	25.6	1.6	1.8	1.9	1.6	1.8	1.74	13	31.48	71.67	T8.5	T9	T12	T8	T8.5	T11	40
89	A654051	31	161	66.5	25.65	1.45	1.5	1.2	1.3	1.12	1.314	11.5	15.47	47.17	T7	T7.5	T11	T7	T7.5	T11	25
90	A653187	26	157	68	27.59	1.5	1.5	1.35	1.2	1.18	1.346	10	14.38	42.34	T6	T6	T10	T6	T6	T10	10
91	A655072	33	163	60.5	22.77	1.4	1.3	1.2	1.5	1.2	1.32	11	15.73	46.6	T7	T7	T11	T7	T7	T11	25
92	A648906	29	168	66	23.38	1.65	1.75	1.7	1.2	1.4	1.54	14	26.62	67.95	T9	T9	T12	T9	T9	T11	45
93	A655482	26	160	59	23.05	1.68	1.8	1.56	1.14	1.2	1.476	13	25.25	63.83	T8	T9	T12	T8	T9	T11	40
94	A655283	28	165	75	27.55	1.25	1.32	1.12	1.01	1.02	1.144	11.5	13.61	42.34	T7	T7	T10.5	T7	T7	T10.5	15
95	A655546	22	158	64	25.64	1.2	1.3	1.36	1.2	1.1	1.232	10	13.15	41.6	T6	T7	T10	T6	T7	T10	10
96	A654479	28	162	72.5	27.63	1.35	1.42	1.42	1.3	1.3	1.358	10.5	15.43	45.1	T6.5	T7	T10	T6.5	T7	T10	10
97	A653933	26	163	74	27.85	0.86	1.88	1.42	1.38	1.06	1.32	13.62	22.15	60.95	T8	T8.5	T11	T8	T8.5	T11	30
98	A655526	20	168	80	28.34	1.75	1.73	1.35	1.67	1.68	1.636	11.74	23.97	59.35	T7	T8	T10.5	T7	T8	T10.5	15
101	A656146	25	166	69	25.04	1.5	1.5	1.6	1.5	1.5	1.52	12.5	22.87	59.93	T7	T8	T11	T7	T8	T11	30
102	A655469	29	155	56	23.31	1.57	1.48	1.4	1.08	1.18	1.342	10.13	14.51	42.68	T6	T7	T11	T6	T7	T10	30
104	A656850	24	160	60	23.44	1.5	1.4	1.2	1.4	1.3	1.36	10	14.35	42.42	T6	T7	T10	T6	T7	T10	30
106	A657601	28	155	64.5	26.85	1.42	1.59	1.46	1.18	1.14	1.358	10	15.1	43.3	T6	T7	T10	T6	T7	T10	15
107	A657537	26	158	70	28.04	1.5	1.47	1.2	1.45	1.2	1.364	10	15.82	44.55	T6	T7	T10	T6	T7	T10	10
108	A657923	29	159	68.5	27.1	1.2	1.4	1.1	1.2	1.1	1.2	12	14.17	46.12	T7	T7	T11	T7	T7	T11	20
109	A657756	26	160	60	23.43	1.2	1.22	1.1	1.2	1.2	1.184	12	13.13	44.48	T7	T8	T11	T7	T8	T11	35
110	A657693	24	158	64	25.64	1.4	1.6	1.45	1.15	1.16	1.352	10	14.95	43.07	T6	T7	T10	T6	T7	T10	15
111	A657821	23	166	62	22.5	1.53	1.75	1.38	1.71	1.68	1.61	11.52	23.66	58.48	T7	T9	T12	T7	T8.5	T11	40
112	A658474	28	162	70	26.67	1.3	1.3	1.4	1.3	1.3	1.32	11	15.18	45.79	T7	T7	T11	T7	T7	T11	20
113	A658012	32	165	68	24.98	1.55	1.48	1.57	1.27	1.42	1.458	11.35	18.89	51.84	T7	T8	T11	T7	T8	T11	25
114	A658481	26	165	67	24.61	1.03	1.63	1.48	1.36	1.16	1.332	12.21	19.3	54.21	T7	T8	T11	T7	T8	T11	30
115	A657724	31	173	70	23.39	1.2	1.5	1.4	1.4	1.18	1.336	13	20.02	57.12	T8	T8.5	T12	T8	T8.5	T11	40
116	A659132	27	165	79	29.02	1.1	1.5	1.4	1.4	1.14	1.308	12	17.4	51.11	T7	T7	T11	T7	T7	T11	20
117	A659332	31	160	63	24.61	1.34	1.4	1.38	1.4	1.2	1.344	12	18.94	53.44	T7	T8	T11	T7	T8	T11	30
119	A659489	31	167	65	23.31	1.48	1.45	1.28	1.2	1.1	1.302	12.3	16.3	50.04	T7	T8	T11	T7	T8	T11	35
120	A659566	30	158	78.5	31.45	1.4	1.6	1.46	1.4	1.2	1.412	10	16.6	45.59	T6	T7	T10	T6	T7	T10	10
121	A659659	31	162	74	28.2	1.6	1.5	1.3	1.2	1.16	1.352	11.3	16.46	48.08	T6	T8	T10.5	T6	T8	T10.5	15
122	A660251	32	160	78	30.47	1.2	1.34	1.25	1.2	1.1	1.218	12	17	54.62	T6	T7	T11	T6	T7	T11	20
124	A660522	27	150	63	28	1.2	1.53	1.45	1.45	1.5	1.426	10	17.27	46.58	T6.5	T7	T10	T6.5	T7	T10	15
125	A660399	23	165	60	22.04	1.3	1.25	1.4	1.4	1.2	1.31	15	20.77	62.51	T8.5	T9	T12	T8.5	T9	T11	40
126	A660635	24	157	60	24.34	1.54	1.68	1.7	1.58	1.4	1.58	12	24.64	60.9	T7	T8.5	T11	T7	T8.5	T11	30
128	A661081	24	166	81	29.39	1.3	1.45	1.3	1.6	1.5	1.43	12	19.27	53.83	T6.5	T7	T11	T6.5	T7	T11	20
130	A661288	22	163	56.5	21.27	1.44	1.27	1.31	1.51	1.66	1.438	12.11	19.11	53.76	T8	T9	T11	T8	T8.5	T11	45
131	A662296	26	161	61	23.53	1.42	1.34	1.32	1.5	1.68	1.452	12	19.06	53.5	T7	T8	T11	T7	T8	T11	35
132	A660076	27	163	75	28.23	1.51	1.6	1.29	1.41	1.12	1.386	11.95	18.78	52.93	T7	T8	T10.5	T7	T8	T10.5	20
133	A662876	29	162	62	23.62	1.6	1.46	1.4	1.42	1	1.376	10.6	16.46	46.65	T6	T7	T10	T6	T7	T10	30
136	A661782	26	167	84	30.12	1.68	1.93	1.57	1.16	1.12	1.492	13.93	26.86	67.49	T8	T8.5	T11	T8	T8	T11	40
137	A663857	24	162	70	26.67	1.59	1.41	1.57	1.14	0.87	1.316	11.83	17.59	50.6	T7	T7.5	T10.5	T7	T7.5	T10.5	20
138	A663868	29	163	83	31.24	1.67	1.48	1.63	1.63	1.05	1.492	13.95	25.77	66.99	T8	T8.5	T11	T8	T8	T11	35
139	A663867	19	161	70	27	1.48	1.46	1.42	1.25	1.23	1.368	8.71	12.65	37.13	T6	T6	T10	T6	T6	T10	10
140	A664230	28	168	66	23.38	1.3	1.6	1.6	1.3	1.2	1.4	13	22	59.72	T8	T8.5	T12	T8	T8.5	T11	40
141	A664531	24	172	74	25.01	1.44	1.2	1.3	1.69	1.2	1.366	12	18.06	52.02	T7	T8	T11	T7	T8	T11	25
142	A664639	35	161	61.5	23.73	1.4	1.3	1.4	1.2	1.2	1.3	11.7	15.75	48.1	T7	T7.5	T11	T7	T7.5	T11	35
143	A665336	29	164	74	27.51	1.12	1.53	1.42	1.45	1.4	1.384	10.95	17.15	48.5	T7	T8	T10	T7	T8	T10	15
144	A665656	28	153	56	23.92	1.22	1.01	1.14	1.19	1.37	1.186	8.42	8.89	30.61	T6	T6	T10	T6	T6	T10	20
145	A665648	31	167	79	28.33	1.59	1.61	1.59	1.4	1.36	1.51	14.19	25.83	67.74	T8	T8.5	T11.5	T8	T8.5	T11.5	30
146	A665791	26	163	61	22.96	1.25	1.5	1.16	1.16	1.18	1.25	13	19.35	55.9	T8	T8.5	T12	T8	T8.5	T11	40
147	A665498	20	158	75	30.04	1.42	1.59	1.46	1.18	1.14	1.358	10.25	15.16	43.92	T6	T6	T10	T6	T6	T10	10
149	A666062	21	160	66	25.78	1.2	1.4	1.34	1.2	1.2	1.268	11.4	15.66	47.35	T7	T7	T11	T7	T7	T11	25
150	A666287	31	158	61.5	24.64	1.2	1.34	1.4	1.3	1.28	1.304	11	15.07	45.62	T7	T7	T11	T7	T7	T11	25
153	A668120	32	150	59	26.22	1.4	1.38	1.42	1.2	1.2	1.32	8.5	11.84	35.5	T6	T7	T10	T6	T7	T10	10
154	A667330	22	152	63	27.27	1.74	1.38	2.15	1.78	1.74	1.758	10.77	26.72	59.98	T7	T8	T11	T7	T8	T10	15
155	A667616	30	165	63.4	23.29	1.3	1.5	1.4	1.27	1.2	1.334	10.5	15.31	44.86	T7	T7	T11	T7	T7	T11	30
156	A668563	22	158	60	24.03	1.03	1.1	1.03	1.16	1.57	1.178	10.48	11.05	37.9	T6.5	T7	T11	T6.5	T7	T11	30
159	A669241	27	162	100	38.1	1.21	1.16	0.97	1.35	1.31	1.2	10.57	11.83	39.49	T6	T6	T10	T6	T6	T10	10
161	A669646	27	164.5	96	35.69	1.25	1.52	1.65	1.18	1.18	1.356	13.04	20.89	58.18	T8	T8	T11	T8	T8	T10	30
