# Supplementary material for: Anatomical Dimensions of the Lumbar Dural Sac Predict the Sensory Block Level of Continuous Epidural Analgesia during Labor
Source: Research Square preprint supplement (doi:10.21203/rs.3.rs-345976/v1), 2021-04-05
Supplement: Supplementary file 4 [file c58da59b6b0c83cab217a721.docx]

知情同意书·知情告知页

亲爱的患者：

医生已经确诊您为产妇，我们将邀请您参加一项研究,本研究为腰硬膜囊的解剖尺寸预测分娩过程中连续硬膜外镇痛的感觉阻滞水平。本研究方案已经得到中国注册临床试验伦理审查委员会伦理委员会审核，同意进行临床研究。

在您决定是否参加这项研究之前，请尽可能仔细阅读以下内容。它可以帮助您了解该项研究以及为何要进行这项研究，研究的程序和期限，参加研究后可能给您带来的益处、风险和不适。如果您愿意，您也可以和您的亲属、朋友一起讨论，或者请医生给予解释，帮助您做出决定。

一、 研究背景和研究目的

1.1 疾病负担和治疗现况：在选择剖宫产的诸多社会因素中，孕妇不能忍受分娩痛为首要原因，分娩镇痛的推广和发展是大势所趋。

1.2 本研究目的：预测硬膜外麻醉的感觉阻滞平面可为围产期精准麻醉提供参考指标。

1.3 研究参加单位和预计纳入参试者例数

（1）研究单位为皖南医学院第一附属医院；

（2）采用G-Power3.1.9.2计算样本量，本研究多元线性回归分析时纳入了产妇BMI,DSD, DSL, DSA 和DSV五个预测指标，设置预期效应值为0.15，检验水准为0.05，检验效能为0.9，故最少样本量为118。

二、哪些人不宜参加研究？

多胎妊娠或有脊髓麻醉病史的患者被排除在外，硬膜外穿刺失败或入组后未完成研究就选择剖宫产的患者也被排除在外。

三、如果参加研究将需要做什么？

1． 在您入选研究前，医生将询问、记录您的病史，并进行超声检查。您是合格的纳入者，您可自愿参加研究，签署知情同意书。如您不愿参加研究，我们将按您的意愿施治。

2. 若您自愿参加研究，将按以下步骤进行：

2.1一般资料：

受试者入选标准：年龄在18岁到45岁之间，ASA状态为II，接受CEA镇痛阴道分娩的产妇被纳入本临床观察性研究。

2.2仪器及设备：

华翔HXD-1多功能监护仪Ⅲ（中国）；

麻醉机（Datex-Ohmeda，Aesprie7900，美国）；

配备2-5 MHz凸阵探头的便携式超声彩色多普勒诊断仪（SonoScape Medical Corp，深圳，中国）；

电子注药泵（Apon，中国南通)

2.3操作步骤：

产妇进入手术室后，建立常规监护。在进行CEA之前注入乳酸林格氏溶液进行预充。硬膜外麻醉前通过配备2-5 MHz凸阵探头的便携式超声彩色多普勒诊断仪系统进行超声扫描（SonoScape Medical Corp，深圳，中国）。患者左侧卧位行超声显像，同一体位行硬膜外穿刺。在硬膜外置管后即刻用视觉模拟评分法（VAS）评价分娩镇痛效果。分别用针刺、酒精浸泡棉和棉签测试疼觉、温觉和触觉阻滞。泵注首次剂量后，前3分钟内每分钟测一次产妇疼痛程度和感觉阻滞平面高度，之后每隔5分钟测一次。待连续三次评测值不变后，每隔30分钟测一次，直到分娩结束。

3. 需要您配合的其他事项

您的随访非常重要，因为医生将判断您接受的治疗是否真正起作用，并及时指导您。如您需要进行其它治疗，请事先与您的医生取得联系。

四、参加研究可能的受益

目前临床上分娩镇痛穿刺定位以盲探为主，参加本实验可以用超声准确定位穿刺点和准确测量硬膜外腔深度，减少多次穿刺的可能性。本实验是没有报酬的，但是作为对您的补偿，本研究相关检查费用将不需您支付。尽管已经有证据提示分娩镇痛有满意的疗效，但这并不能保证对您肯定有效。本研究所采用的超声定位也不是保证分娩镇痛有效的方法。如对您的病情无效，您可以向医生询问有可能获得的替代治疗方法。

五、参加研究可能的不良反应、风险和不适、不方便

本实验是观察性实验，分娩镇痛在临床上已有广泛的应用，如果您的健康确因参加这项实验而受到伤害，请立即通知研究医生，将负责对您采取适当的治疗措施，我院将承担治疗费用及按国家有关规定对您给予相应的经济补偿。对因医疗事故或因未遵循研究方案程序而导致的损伤，我院不予以补偿。如果在研究期间您出现任何不适，或病情发生新的变化，或任何意外情况，不管是否与研究有关，均应及时通知您的医生，他/她将对此作出判断并给与适当的医疗处理。

六、有关费用

本研究相关检查费用将不需您支付。如果您的健康确因参加这项实验而受到伤害，请立即通知研究医生，将负责对您采取适当的治疗措施，我院将承担治疗费用及按国家有关规定对您给予相应的经济补偿。如果在临床试验中出现不良事件，医学专家委员会将会鉴定其是否与研究使用的器材有关。申办者将按照我国《药物临床试验质量管理规范》的规定对与试验相关的损害提供治疗的费用及相应的经济补偿。对于您同时合并的其他疾病所需的治疗和检查，将不在免费的范围之内。

七、个人信息的保密

您的医疗记录（研究病历/CRF、化验单等）将完整地保存在您所就诊的医院。医生会将化验和其它检查结果记录在您的病历上。研究者、伦理委员会和药品监督管理部门将被允许查阅您的医疗记录。任何有关本项研究结果的公开报告将不会披露您的个人身份。我们将在法律允许的范围内，尽一切努力保护您个人医疗资料的隐私。按照医学研究伦理，除了个人隐私信息外，试验数据将可供公众查询和共享，查询和共享将只限于基于网络的电子数据库，保证不会泄漏任何个人隐私信息。

八、怎样获得更多的信息？

您可以在任何时间提出有关本项研究的任何问题，并得到相应的解答。如果在研究过程中有任何重要的新信息，可能影响您继续参加研究的意愿时，您的医生将会及时通知您。

九、可以自愿选择参加研究和中途退出研究

是否参加研究完全取决于您的意愿。您可以拒绝参加此项研究，或在研究过程中的任何时间退出本研究，这都不会影响您和医生间的关系，都不会影响对您的医疗或有其他方面利益的损失。出于对您的最大利益考虑，医生或研究者可能会在研究过程中随时中止您继续参加本项研究。如果您因为任何原因从研究中退出，您可能被询问有关您使用试验药物的情况。如果医生认为需要，您也可能被要求进行实验室检查和体格检查。

十、现在该做什么？

是否参加本项研究由您自己（和您的家人）决定。在您做出参加研究的决定前，请尽可能向你的医生询问有关问题。

感谢您阅读以上材料。如果您决定参加本项研究，请告诉您的医生，他/她会为您安排一切有关研究的事务。请您保留这份资料。

知情同意书.同意签字页

临床研究项目名称：腰硬膜囊的解剖尺寸预测分娩过程中连续硬膜外镇痛的感觉阻滞水平

课题承担单位: 皖南医学院第一附属医院

同意声明

我已经阅读了上述有关本研究的介绍，而且有机会就此项研究与医生讨论并提出问

题。我提出的所有问题都得到了满意的答复。

我知道参加本研究可能产生的风险和受益。我知晓参加研究是自愿的，我确认已有

充足时间对此进行考虑，而且明白：

● 我可以随时向医生咨询更多的信息。

● 我可以随时退出本研究，而不会受到歧视或报复，医疗待遇与权益不会受到影响。

我同样清楚，如果我中途退出研究，特别是由于药物的原因使我退出研究时，我若将我的病情变化告诉医生，完成相应的体格检查和理化检查，这将对整个研究十分有利。如果因病情变化我需要采取任何其他的药物治疗，我会在事先征求医生的意见，或在事后如实告诉医生。我同意药品监督管理部门伦理委员会或申办者代表查阅我的研究资料。我将获得一份经过签名并注明日期的知情同意书副本。最后，我决定同意参加本项研究，并保证尽量遵从医嘱。

患者签名： ＿ ＿ ＿ ＿ 年 ＿ ＿ 月 ＿ ＿ 日

联系电话：

我确认已向患者解释了本试验的详细情况，包括其权力以及可能的受益和风险，并给其一份签署过的知情同意书副本。

医生签名： ＿ ＿ ＿ ＿ 年 ＿ ＿ 月 ＿ ＿ 日

医生的工作电话：
